# Supplementary material
Source: publisher site journal article supplement (https://www.spandidos-publications.com/4480/downloadSupplementary)
Supplement: Supplementary file 1 [file downloadSupplementary]

Table SI. Association of carcinoma KIF2A with para-carcinoma KIF2A protein expression.

| Item                | Carcinoma low | Carcinoma high | P-value |
|---------------------|---------------|----------------|---------|
| Para-carcinoma low  | 73 (36.5)     | 76 (38.0)      | 0.007   |
| Para-carcinoma high | 14 (7.0)      | 37 (18.5)      |         |

Values are expressed as n (%). KIF2A, kinesin family member 2A.
